# Supplementary material for: CALCOCO1 acts with VAMP‐associated proteins to mediate ER‐phagy
Source: PubMed Central journal article supplement (PMC7396842; doi:10.15252/embj.2019103649), 2020-06-11

## **Appendix: Table of Contents**

Appendix Table S1.....page 2-7

Appendix Figure legends.....page 8

Appendix Figure S1.....page 9

Appendix Figure S2..... page 10

Appendix Table S1. **Plasmids used in this study**

|                                                  |            |
|--------------------------------------------------|------------|
| pDONOR221-CALCOCO1                               | This study |
| pDONOR221-CALCOCO1 141-LVV/141-AAA               | This study |
| pDONOR221-CALCOCO1 (1-150)                       | This study |
| pDONOR221-CALCOCO1(145-513)                      | This study |
| pDONOR221-CALCOCO1(514-691)                      | This study |
| pDONOR221-CALCOCO1 $\Delta$ SKICH                | This study |
| pDONOR221-CALCOCO1 $\Delta$ CC                   | This study |
| pDONOR221-CALCOCO1 $\Delta$ 514-691              | This study |
| pDONOR221-CALCOCO1 $\Delta$ LIR $\Delta$ 514-691 | This study |
| pDONOR221-CALCOCO1 $\Delta$ LIR $\Delta$ 623-691 | This study |
| pDONOR221-CALCOCO1 $\Delta$ 145-205              | This study |
| pDONOR221-CALCOCO1 $\Delta$ 231-339              | This study |
| pDONOR221-CALCOCO1 $\Delta$ 413-513              | This study |
| pDONOR221-CALCOCO1(145-670)                      | This study |
| pDONOR221-CALCOCO1(145-680)                      | This study |
| pDONOR221-CALCOCO1(680-FFF/AAA)                  | This study |
| pDONOR221-CALCOCO1 $\Delta$ 671-691              |            |
| pDest-MYC-CALCOCO1                               | This study |
| pDest-MYC-CALCOCO1 $\Delta$ LIR                  | This study |
| pDest-MYC-CALCOCO1 (1-150)                       | This study |
| pDest-MYC-CALCOCO1-(145-513)                     | This study |

|                                                  |                     |
|--------------------------------------------------|---------------------|
| pDest-MYC-CALCOCO1(514-691)                      | This study          |
| pDest-MYC-CALCOCO1 $\Delta$ SKICH $\Delta$ LIR   | This study          |
| pDest-MYC-CALCOCO1 $\Delta$ CC                   | This study          |
| pDest-MYC-CALCOCO1 $\Delta$ 514-691              | This study          |
| pDest-MYC-CALCOCO1 $\Delta$ LIR $\Delta$ 623-691 | This study          |
| pDest-MYC-CALCOCO1 $\Delta$ 145-205              | This study          |
| pDest-MYC-CALCOCO1 $\Delta$ 231-339              | This study          |
| pDest-MYC-CALCOCO1 $\Delta$ 413-513              | This study          |
| pDest-MYC-CALCOCO1(145-670)                      | This study          |
| pDest-MYC-CALCOCO1(145-680)                      | This study          |
| pDest-MYC-CALCOCO1 $\Delta$ (680-FFF/AAA)        | This study          |
| PDest53-CALCOCO1                                 | This study          |
| pcDNA-Dest53 (GFP fusion)                        | Invitrogen          |
| pDest-EGFP-C1                                    | Lamark et al., 2003 |
| pDest-EGFP-CALCOCO1                              | This study          |
| pDest-EGFP-CALCOCO1 $\Delta$ 671-691             | This study          |
| pDest-FlpIn-EGFP-CALCOCO1                        | This study          |
| pDestmCherry-CALCOCO1                            | This study          |
| pDONOR221-TAX1BP1                                | This study          |
| pDONOR221-TAX1BP1 $\Delta$ LIR                   | This study          |
| pDONOR221-TAX1BP1mLIR $\Delta$ 701-789           | This study          |
| pDest-MYC-TAX1BP1                                | This study          |

|                                        |                     |
|----------------------------------------|---------------------|
| pDest-MYC-TAX1BP1 $\Delta$ LIR         | This study          |
| pDest-MYC-TAX1BP1mLIR $\Delta$ 701-789 | This study          |
| pDONOR221-NDP52                        | This study          |
| pDONOR221-NDP52 $\Delta$ LIR           | This study          |
| pDest-MYC-NDP52                        | This study          |
| pDest-MYC-NDP52 $\Delta$ LIR           | This study          |
| pDONOR221-VAPA                         | This study          |
| pDONOR221-VAPA(K94D/M96D)              | This study          |
| pDest-MYC-VAPA                         | This study          |
| pDest-FlpIn-EGFP-VAPA                  | This study          |
| PDest15-VAPA                           | This study          |
| PDest15-VAPA(K94D/M96D)                | This study          |
| pDest-mCherry-EYFP-VAPA                | This study          |
| pDONOR221-VAPB                         | This study          |
| pDONOR221-VAPB(K87D/M89D)              | This study          |
| PDest15-VAPB                           | This study          |
| pDest-MYC-VAPB                         | This study          |
| pDest15-VAPB(K87D/M89D)                | This study          |
| pENTR-GABARAP                          | Pankiv et al., 2007 |
| pENTR-GABARAPL1                        | Pankiv et al., 2007 |
| pENTR-GABARAPL2                        | Pankiv et al., 2007 |
| pENTR-LC3A                             | Pankiv et al., 2007 |

|                                    |                     |
|------------------------------------|---------------------|
| pENTR-LC3B                         | Pankiv et al., 2007 |
| pENTR-LC3C                         | Kirkin et al., 2009 |
| pENTR-GABARAP Y49A (mLDS)          | Alemu et al., 2012  |
| pENTR-GABARAPL1 Y49A (mLDS)        | This study          |
| pENTR-GABARAPL2 Y49A (mLDS)        | This study          |
| pENTR-LC3B F52A (mLDS)             | Kirkin et al., 2009 |
| pENTR-LC3C F58A (mLDS)             | This study          |
| pENTR-GABARAP $\Delta$ UDS         | This study          |
| pENTR-GABARAPL1 $\Delta$ UDS       | This study          |
| pENTR-GABARAPL2 $\Delta$ UDS       | This study          |
| pENTR-GABARAP Y49A/ $\Delta$ UDS   | This study          |
| pENTR-GABARAPL1 Y49A/ $\Delta$ UDS | This study          |
| pENTR-GABARAPL2 Y49A/ $\Delta$ UDS | This study          |
| pENTR-LC3B F52A/ $\Delta$ UDS      | This study          |
| pENTR-LC3C F58A/ $\Delta$ UDS      | This study          |
| pDest15-GABARAP                    | Pankiv et al., 2007 |
| pDest15-GABARAPL1                  | Pankiv et al., 2007 |
| pDest15-GABARAPL2                  | Pankiv et al., 2007 |
| pDest15-LC3A                       | Pankiv et al., 2007 |
| pDest15-LC3B                       | Pankiv et al., 2007 |
| pDest-mCherry-EYFP-LC3B            | Pankiv et al., 2007 |
| pDest15-LC3C                       | Kirkin et al., 2009 |

|                                                             |                     |
|-------------------------------------------------------------|---------------------|
| pDest15-GABARAP Y49A                                        | Alemu et al., 2012  |
| pDest15-GABARAPL1 Y49A                                      | This study          |
| pDest15-GABARAPL2 Y49A                                      | This study          |
| pDest15-LC3B F52A                                           | Kirkin et al., 2009 |
| pDest15-LC3C F58A                                           | This study          |
| pDest15-GABARAP $\Delta$ UDS                                | This study          |
| pDest15-GABARAPL1 $\Delta$ UDS                              | This study          |
| pDest15-GABARAPL2 $\Delta$ UDS                              | This study          |
| pDest15-GABARAP Y49A/ $\Delta$ UDS                          | This study          |
| pDest15-GABARAPL1 Y49A/ $\Delta$ UDS                        | This study          |
| pDest15-GABARAPL2 Y49A/ $\Delta$ UDS                        | This study          |
| pDest15-LC3B F52A/ $\Delta$ UDS                             | This study          |
| pDest15-LC3C F58A/ $\Delta$ UDS                             | This study          |
| pCDH EF1 $\alpha$ IRES Puro mCherry EGFP<br>FAM13 4b 82-238 | This study          |

## References:

- Alemu, E.A., Lamark, T., Torgersen, K.M., Birgisdottir, A.B., Bowitz Larsen, K., Jain, A., Olsvik, H., Øvervatn, A., Kirkin, V. and Johansen, T. 2012. ATG8 Family Proteins Act as Scaffolds for Assembly of the ULK Complex: Sequence Requirements for LC3-Interacting Region (LIR) Motifs. *J. Biol. Chem.* **287**, 39275-39290
- Kirkin, V., Lamark, T., Sou, Y.S., Bjørkøy, G., Nunn, J.L., Bruun J-A., Shvets, E., McEwan, D.G., Clausen, T.H., Wild, P., Bilusic, I., Theurillat, J.P., Øvervatn, A., Ishii, T., Elazar, Z., Komatsu, M., Dikic, I. and Johansen, T. 2009. A role for NBR1 in autophagosomal degradation of ubiquitinated substrates. *Mol. Cell* **33**, 505-516.
- Lamark, T., Perander, M., Outzen, H., Kristiansen, K., Øvervatn, A., Michaelsen, E., Bjørkøy, G. and Johansen, T. 2003. Interaction codes within the family of mammalian PB1 domain-containing

proteins. *Journal of Biological Chemistry*, **278**, 34568-34581.

**Pankiv, S., Høyvarde Clausen, T., Lamark, T., Brech, A., Bruun, J-A., Outzen, H., Øvervatn, A., Bjørkøy, G. and Johansen, T.** 2007. p62/SQSTM1 binds directly to Atg8/LC3 to facilitate degradation of ubiquitinated protein aggregates by autophagy. *Journal of Biological Chemistry*, **282**, 24131-24145.

**Appendix Figure S1. Generation of CRISPR/CAS9-mediated HeLa and HEK293 FlpIn CALCOCO1 KO cells,**

- A HeLa FlpIn CALCOCO1 KO cells generated with the indicated gRNA for genomic editing of targeted exons 2. Shown are the genomic sequences of four mutated alleles in CALCOCO1 KO clone 38.
- B HEK293 FlpIn CALCOCO1 KO cells generated targeting exon 2 and exon 4 with two different gRNAs. CALCOCO1 KO cells were verified with both western blot and genomic sequencing of regions encompassing exon 2 and exon 4.

**Appendix Figure S2. Co-localization of CALCOCO1 with p62 and LC3B depends on the LIR and UIR motifs.**

- A, B HeLa CALCOCO1 KO cells reconstituted with EGFP-CALCOCO1 (A) or EGFP-CALCOCO1 mLIR+ΔUIR (B) were starved with or without Baf A1 treatment as indicated, and then immunostained for endogenous p62 and LC3B. Scale bars, 5  $\mu$ m.
- C HeLa CALCOCO1 KO cells stably expressing EGFP-CALCOCO1 were starved or not for 2 hours and then immunostained with anti-ATG13 and anti-WIP1 antibodies. Scale bars, 10  $\mu$ m.



# Appendix Fig S1

**A**

CRISPR/CAS9 CALCOCO1 KO in HeLa FlpIn cells

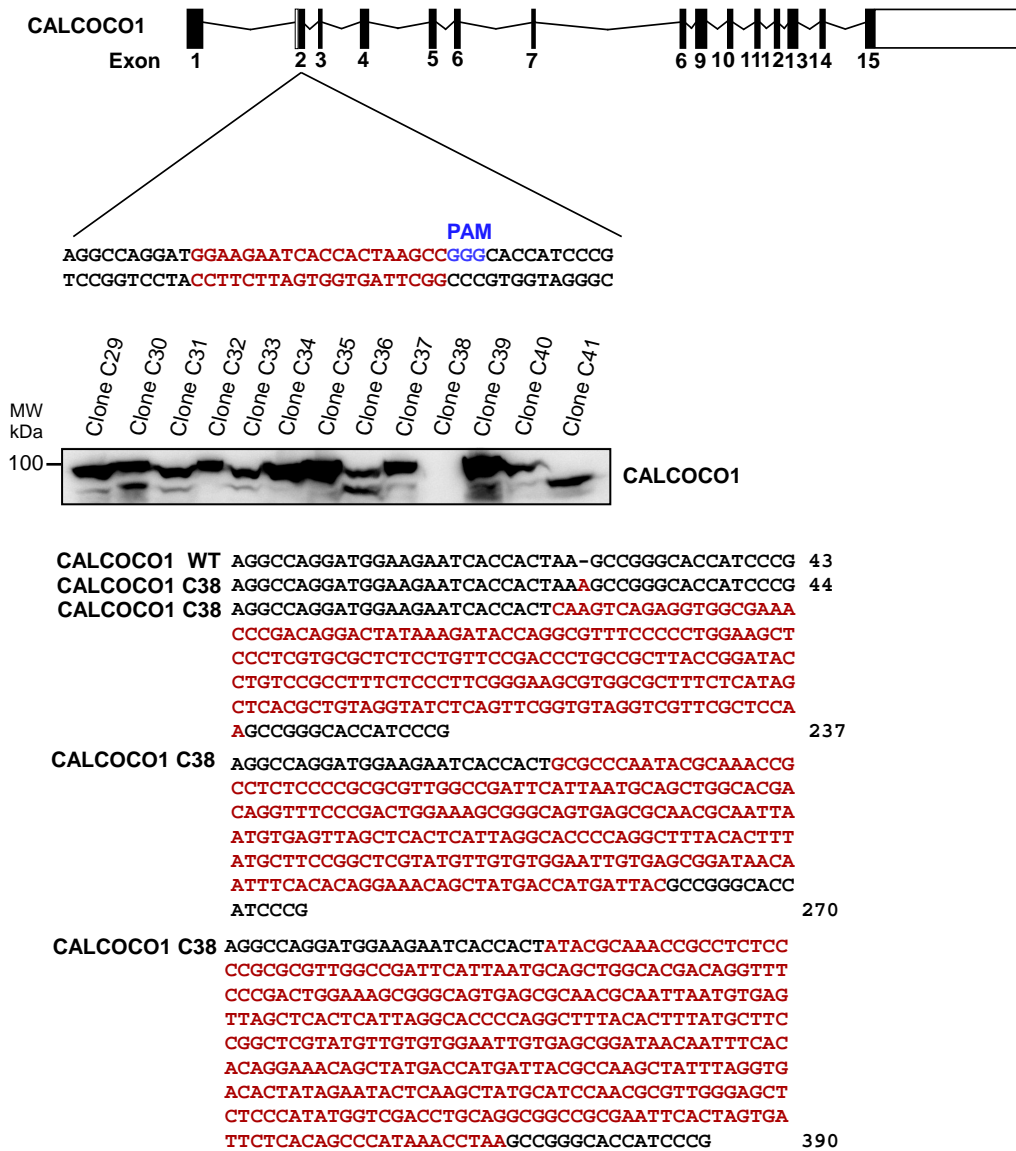

**B**

CRISPR/CAS9 CALCOCO1 KO in HEK293 FlpIn cells

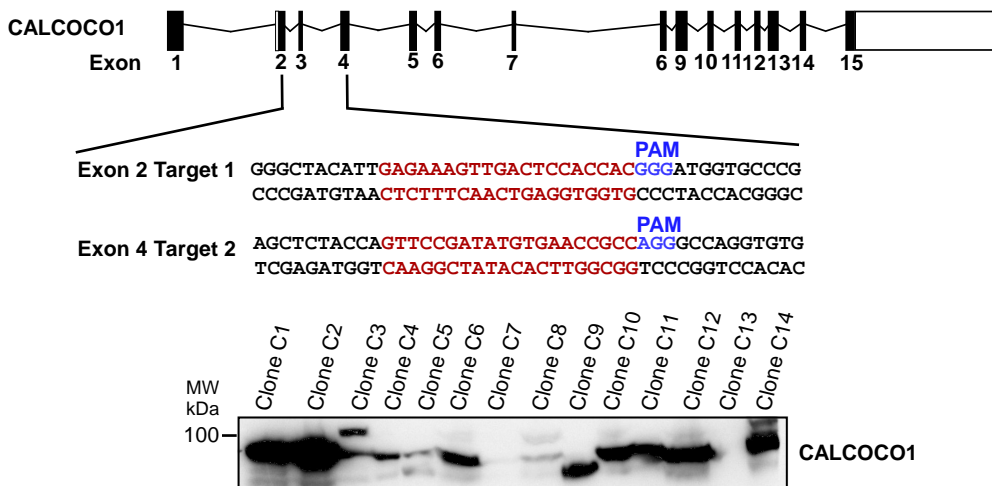

Appendix Fig S2

**A**

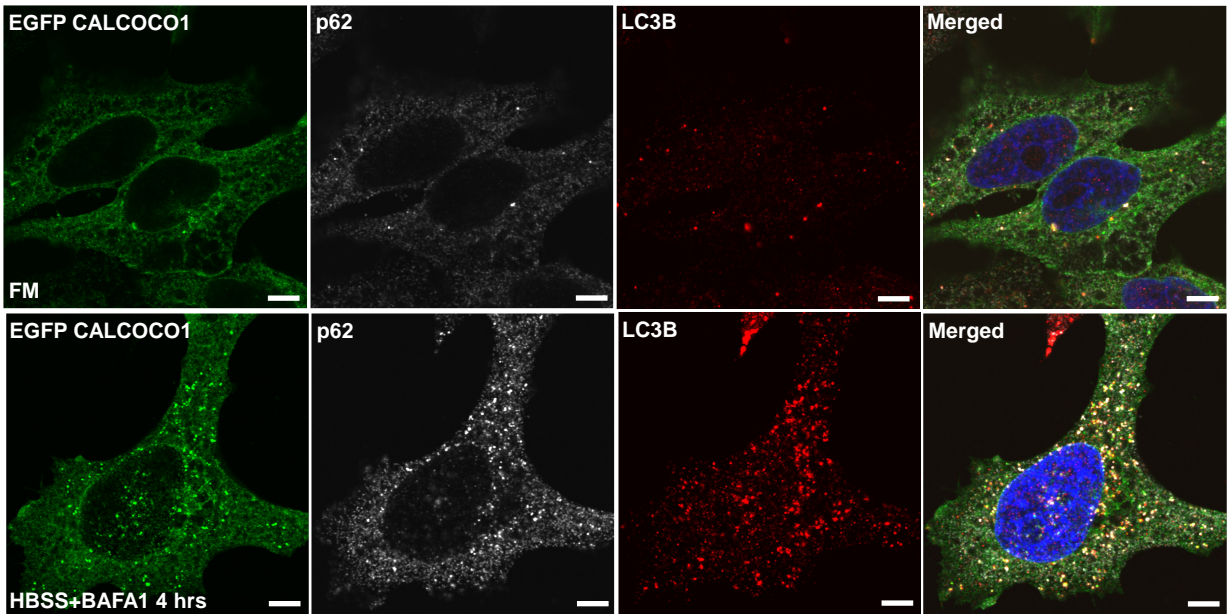

**B**

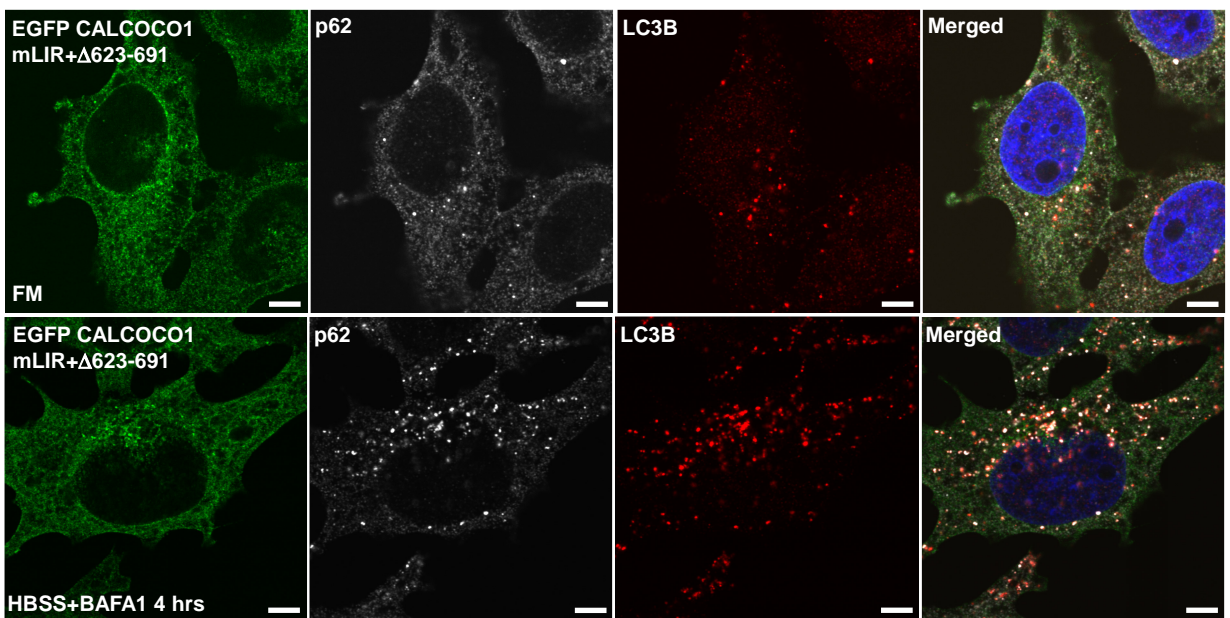

**C**

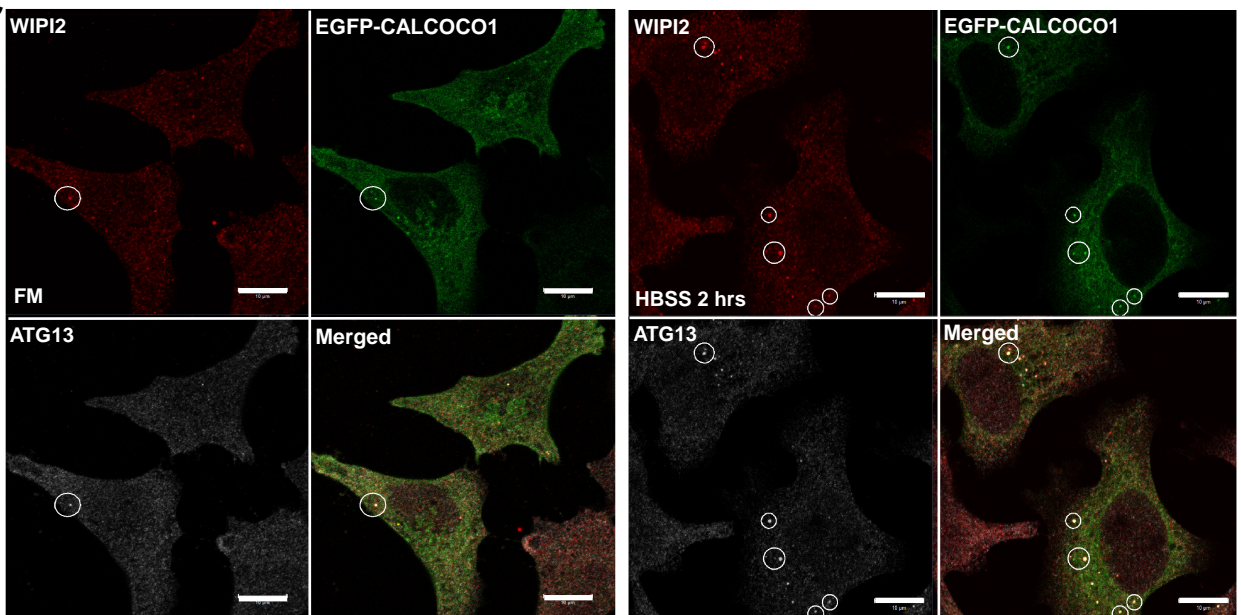

Supplement: EMBJ-39-e103649-s001.pdf [file EMBJ-39-e103649-s001.pdf]
