# Supplementary material for: CALCOCO1 acts with VAMP‐associated proteins to mediate ER‐phagy
Source: PubMed Central journal article supplement (PMC7396842; doi:10.15252/embj.2019103649), 2020-06-11
Supplement: EMBJ-39-e103649-s002.pdf [file EMBJ-39-e103649-s002.pdf]

## Expanded View Figures

**Figure EV1. CALCOCO1 homomerizes via coiled-coil domains, but does not heterodimerize with TAX1BP1 or NDP52.**

- A Co-immunoprecipitation (co-IP) of Myc-CALCOCO1 with EGFP-CALCOCO1, following transient co-transfection of EGFP-CALCOCO1 and indicated Myc-CALCOCO1 constructs in HEK293 cells.
- B Co-IP of Myc-CALCOCO1 with EGFP-CALCOCO1. <sup>35</sup>S-GFP-CALCOCO1 (upper panels) or <sup>35</sup>S-GFP (lower panels) were *in vitro* co-transcribed/translated with indicated <sup>35</sup>S-Myc-CALCOCO1 constructs. GFP-CALCOCO1 or GFP, respectively, were immunoprecipitated with GFP-TRAP and the immunoprecipitates then resolved by SDS-PAGE. The resolved immunoprecipitates were detected by autoradiography.
- C GFP-CALCOCO1 or GFP were *in vitro* co-transcribed/translated with Myc-CALCOCO1, Myc-NDP52, or Myc-TAX1BP1 and then immunoprecipitated with GFP-TRAP. The analysis of the immunoprecipitates was done as in B. GFP construct is indicated with a circle and Myc-constructs with a star.
- D GST pull-down analyses of binding of *in vitro* transcribed/translated <sup>35</sup>S-Myc-CALCOCO1 with recombinant GST-tagged Galectin-3 and -8. *In vitro* transcribed/translated Myc-NDP52 and Myc-TAX1BP1 were included as positive controls.

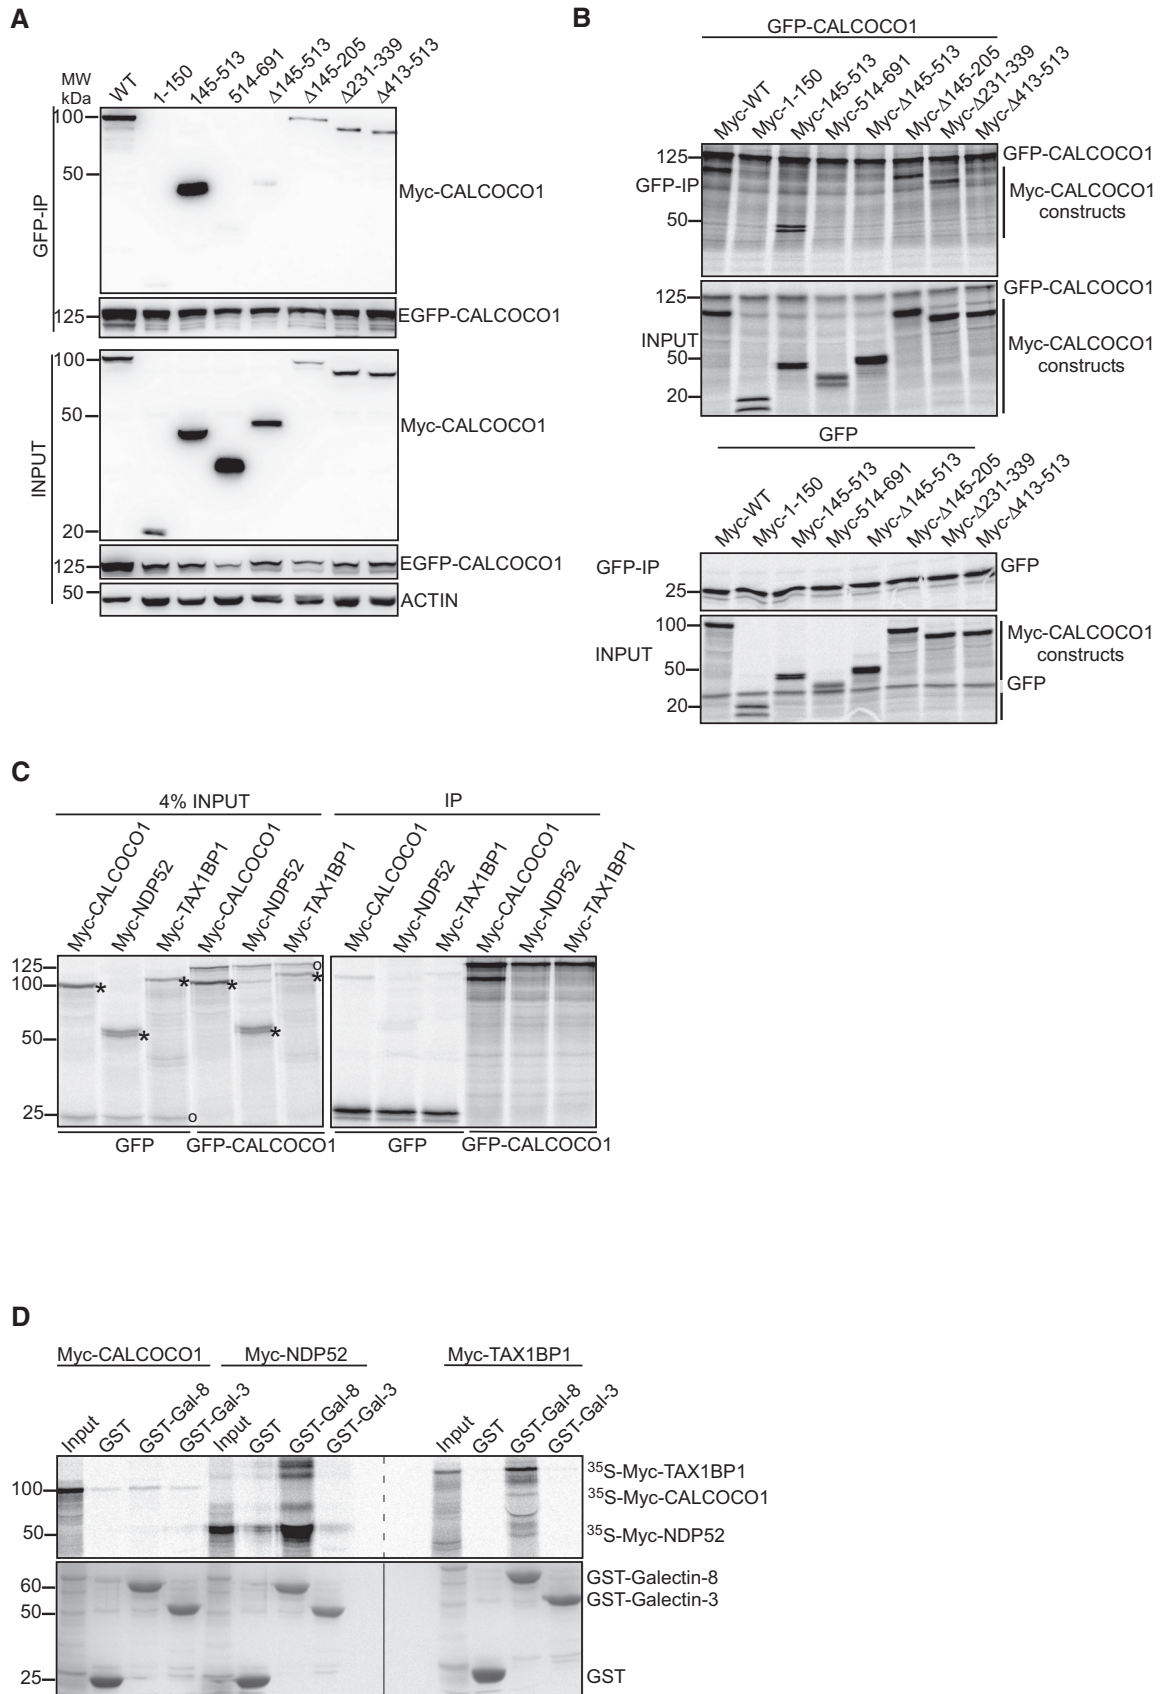

Figure EV1.

**Figure EV2. CALCOCO1 is degraded by autophagy and co-localizes in HBSS-treated cells with p62, LC3B, and GABARAP.**

- A, B Immunoblot analysis of indicated cell lines, starved for 6 h (HBSS) as indicated, and treated with MG132 or Baf A1 as indicated.
- C Extension of Fig 1G. HeLa CALCOCO1 KO cells stably transfected with EGFP-CALCOCO1 were induced with tetracycline for 24 h and then starved (HBSS) with or without Baf A1 treatment as indicated, before immunostaining for endogenous p62 and LC3B. Scale bars, 5  $\mu$ m for confocal microscopy images, 2  $\mu$ m for airyscans.
- D Extension of Fig 1J. Percentage of LAMP1 rings associated with a CALCOCO1 structure. The error bars represent mean  $\pm$  SEM of three independent experiments per condition and 200 cells per experiment.
- E HeLa cells stably transfected with EGFP-CALCOCO1 were treated with tetracycline for 24 h to induce expression of EGFP-CALCOCO1. Cells were then starved or not and immunostained with anti-p62, anti-LC3, and anti-GABARAP antibodies as indicated. Co-localization in dots is indicated by circles and supported using line plots shown below the micrographs. Scale bars, 10  $\mu$ m.

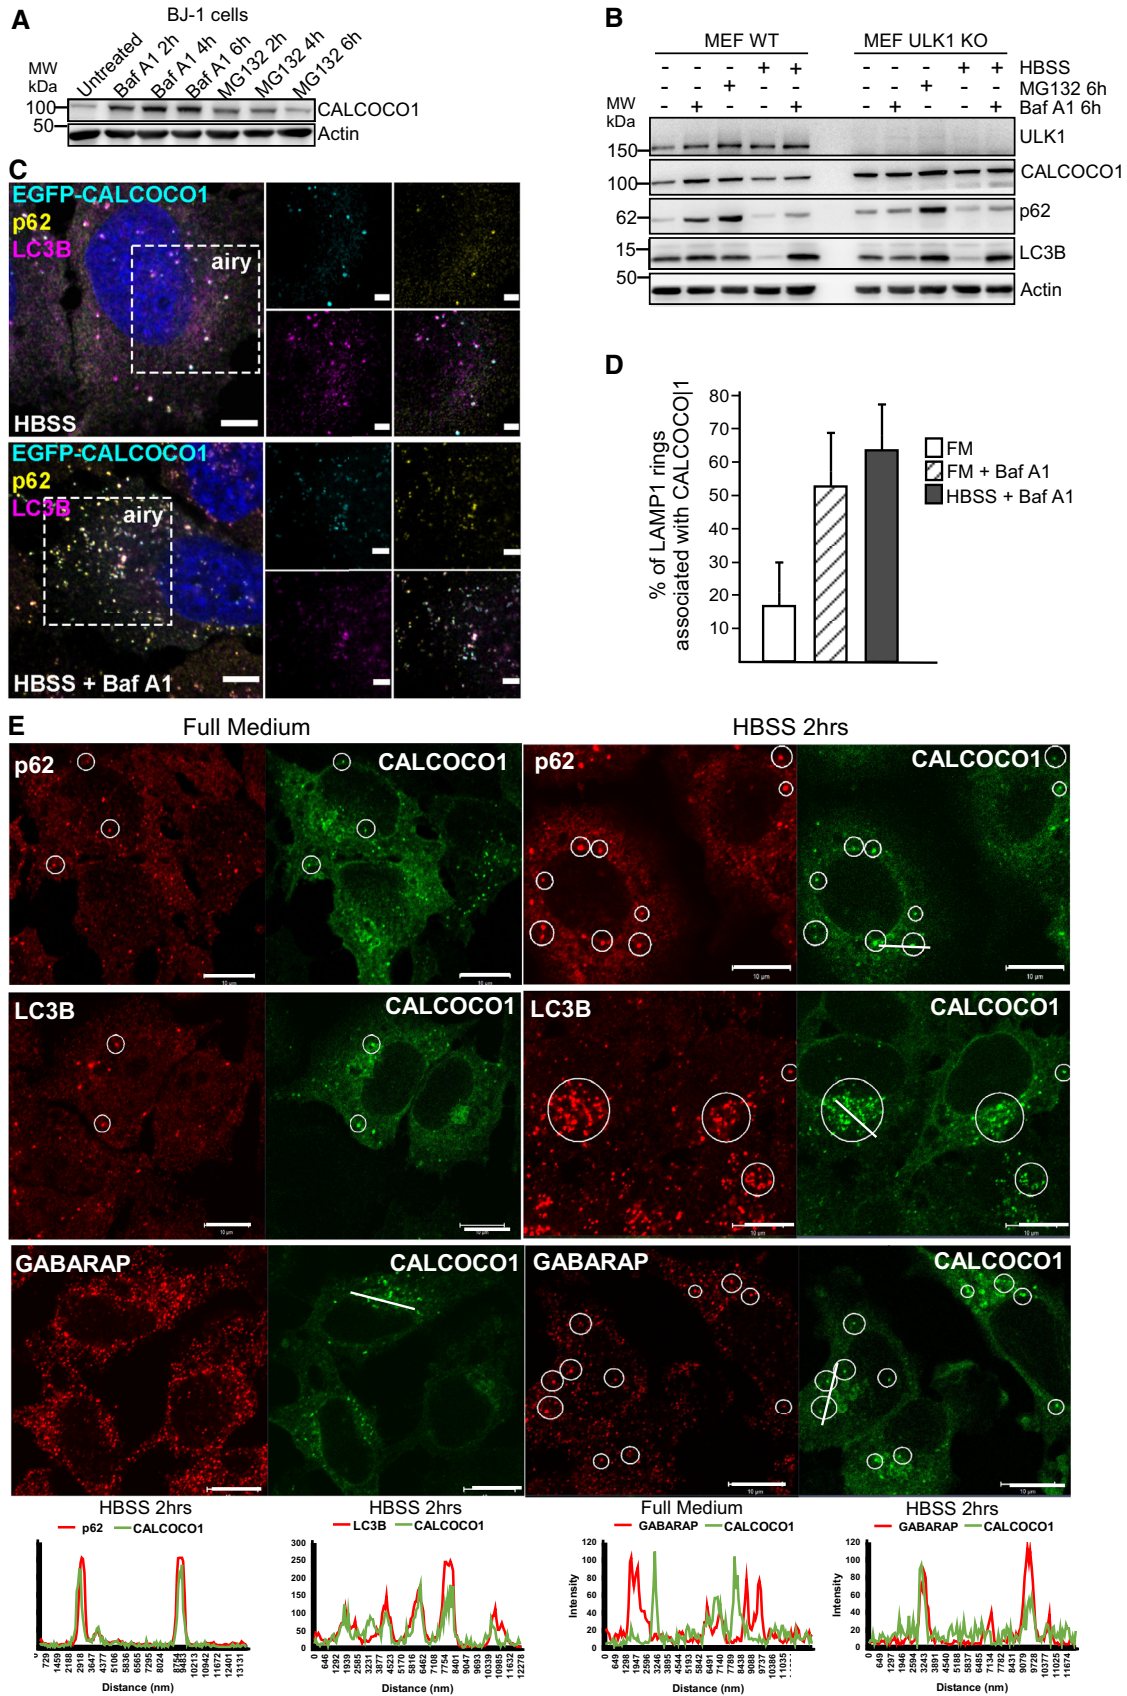

Figure EV2.

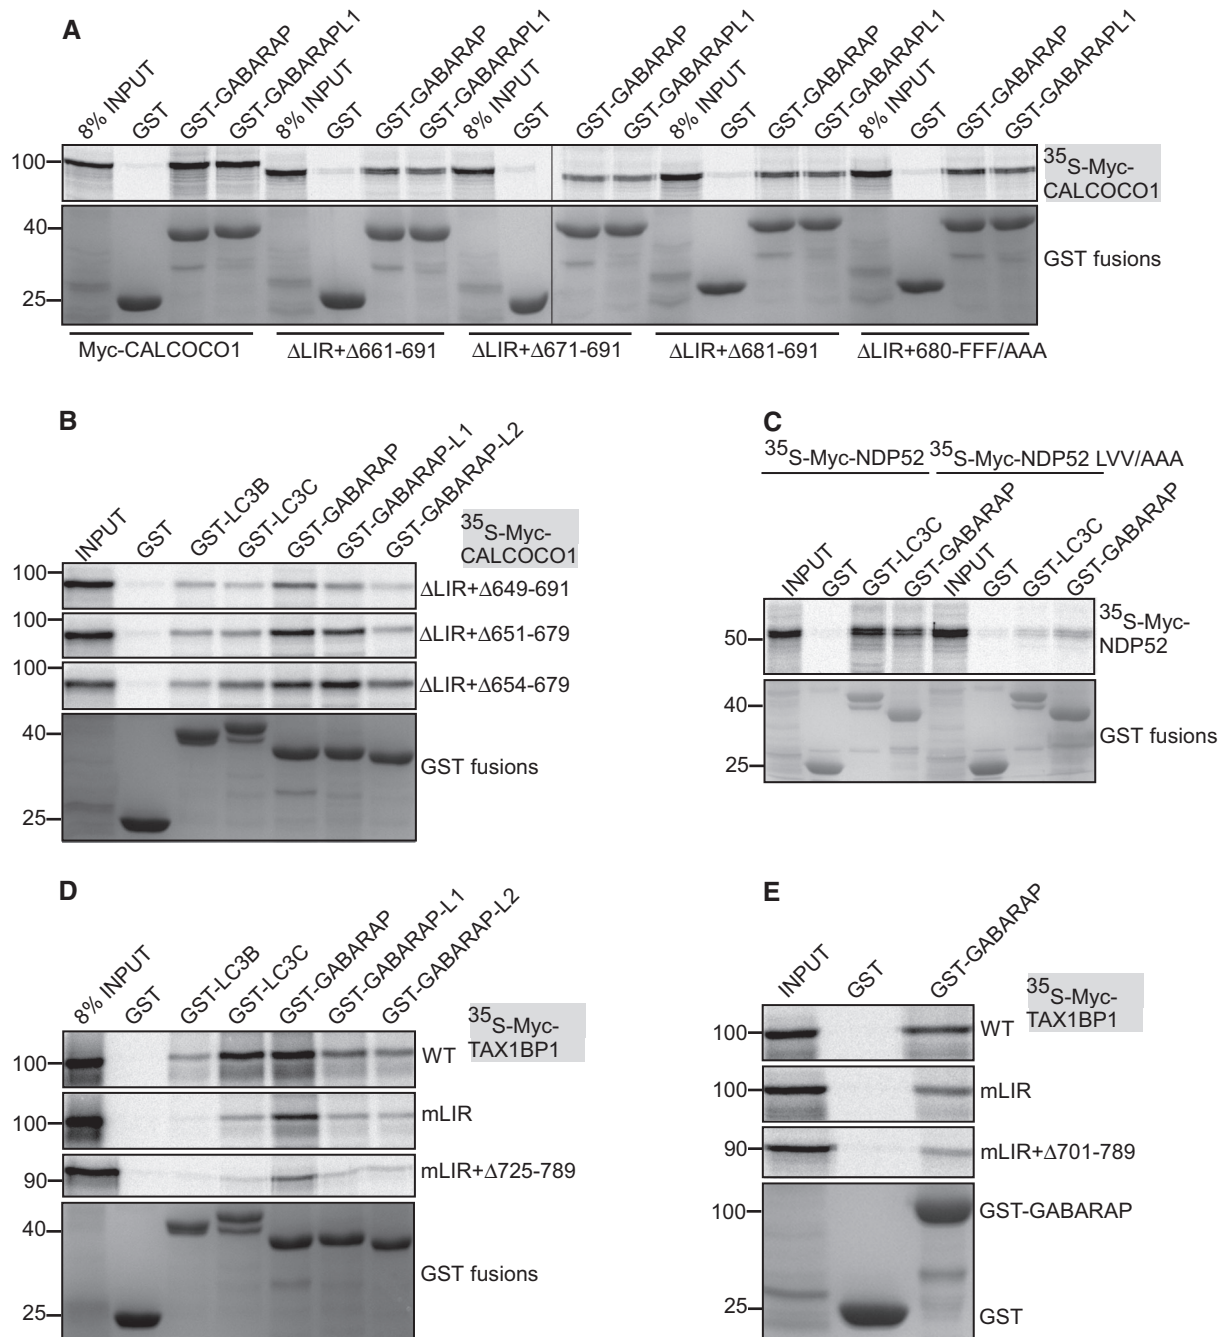

**Figure EV3. The C-terminal parts of CALCOCO1 and TAX1BP1 contribute to their interaction with ATG8 family proteins.**

- A, B GST pull-down binding of the indicated *in vitro* transcribed/translated <sup>35</sup>S-Myc-CALCOCO1 constructs with recombinant GST-tagged ATG8 family proteins.
- C GST pull-down analyses of binding of *in vitro* transcribed/translated WT or LIR-mutated (LVV/AAA) <sup>35</sup>S-Myc-NDP52 with recombinant GST-tagged ATG8 family proteins.
- D, E GST pull-down analyses of binding of indicated *in vitro* transcribed/translated <sup>35</sup>S-Myc-TAX1BP1 constructs with indicated recombinant GST-tagged ATG8 family proteins.

**Figure EV4. CALCOCO1 KO inhibits basal autophagy.**

- A, B WT or CALCOCO1 KO HeLa cells were transiently transfected with mCherry-EGFP-LC3B and 24 h after transfection, the cells were treated or not with HBSS as indicated. In (A), representative confocal images are shown, and in (B), the fraction of red-only puncta is counted and shown as a percentage. The error bars represent mean  $\pm$  SD of red-only puncta percentages of three independent experiments. Statistical comparison was analyzed by one-way ANOVA followed by Tukey multiple comparison test and significance displayed as \*\*\* $P < 0.001$ ; ns is not significant. The arrows in FM show either red-only or red + green puncta while in the HBSS-treated cells, the arrows show red-only puncta.
- C GST pull-down analyses of binding of different *in vitro* transcribed/translated  $^{35}\text{S}$ -Myc-tagged ER proteins to recombinant GST-tagged CALCOCO1. GST is included as a negative control.
- D CALCOCO1 KO HeLa cells were transiently transfected with the indicated EGFP-CALCOCO1 constructs and immunostained for endogenous VAPA. Scale bars, 10  $\mu\text{m}$ .
- Source data are available online for this figure.

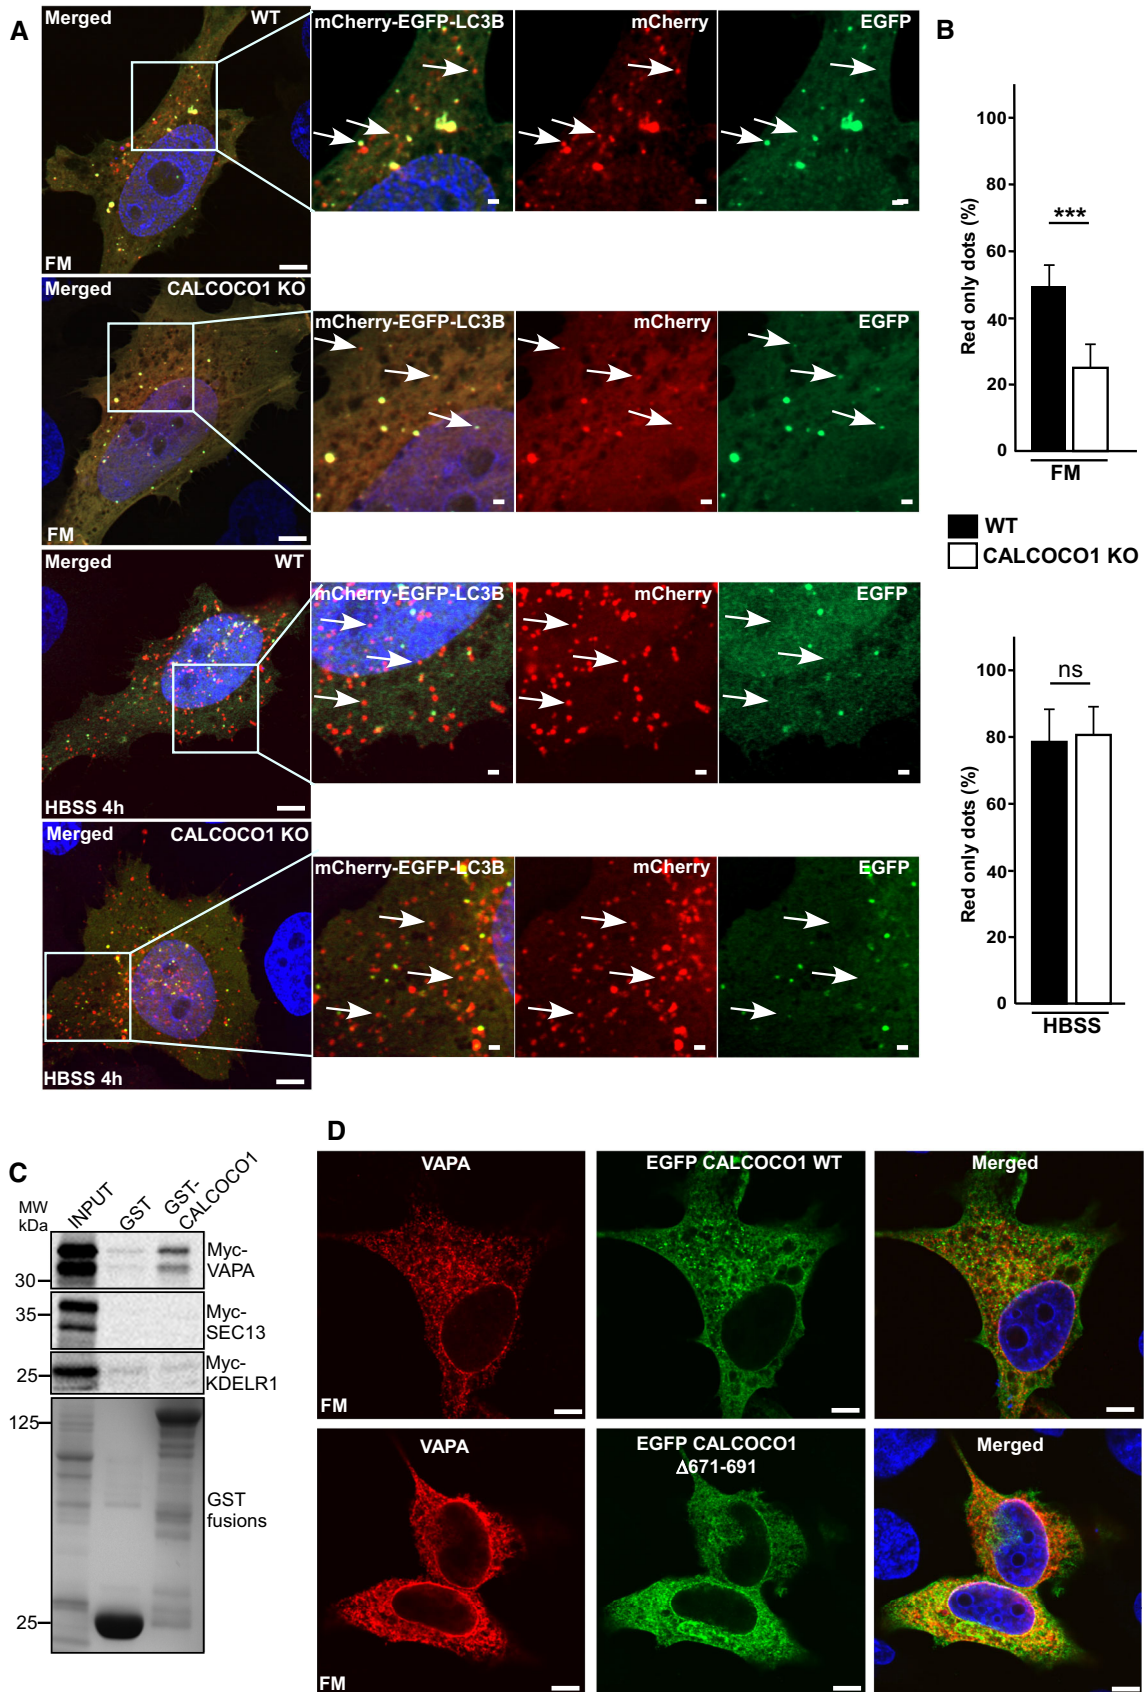

Figure EV4.

**Figure EV5. CALCOCO1 KO inhibits autophagic degradation of VAPA under starvation.**

- A, B WT or CALCOCO1 KO HeLa cells were transiently transfected with mCherry-EGFP-VAPA or mCherry-EGFP-FAM134B as indicated and 24 h after transfection, the cells were treated or not with HBSS as indicated. In (A), representative confocal images are shown, and in (B), the fraction of red-only puncta is counted and shown as a percentage. The error bars represent mean  $\pm$  SD of red-only puncta percentages of three independent experiments. Statistical comparison was analyzed by one-way ANOVA followed by Tukey multiple comparison test and significance displayed as \*\*\* $P < 0.001$ ; ns is not significant. The arrows in FM show either red-only (WT cells) or red + green puncta (CALCOCO1 KO cells) while in the HBSS-treated cells, the arrows show red-only puncta.
- C Immunoblot analysis of HeLa CALCOCO1 KO cell lines reconstituted with EGFP-CALCOCO1  $\Delta$ 145–513. Expression of EGFP-CALCOCO1  $\Delta$ 145–513 was induced or not with tetracycline, and the cells were treated with MG132, HBSS, or Baf A1 as indicated.

Source data are available online for this figure.



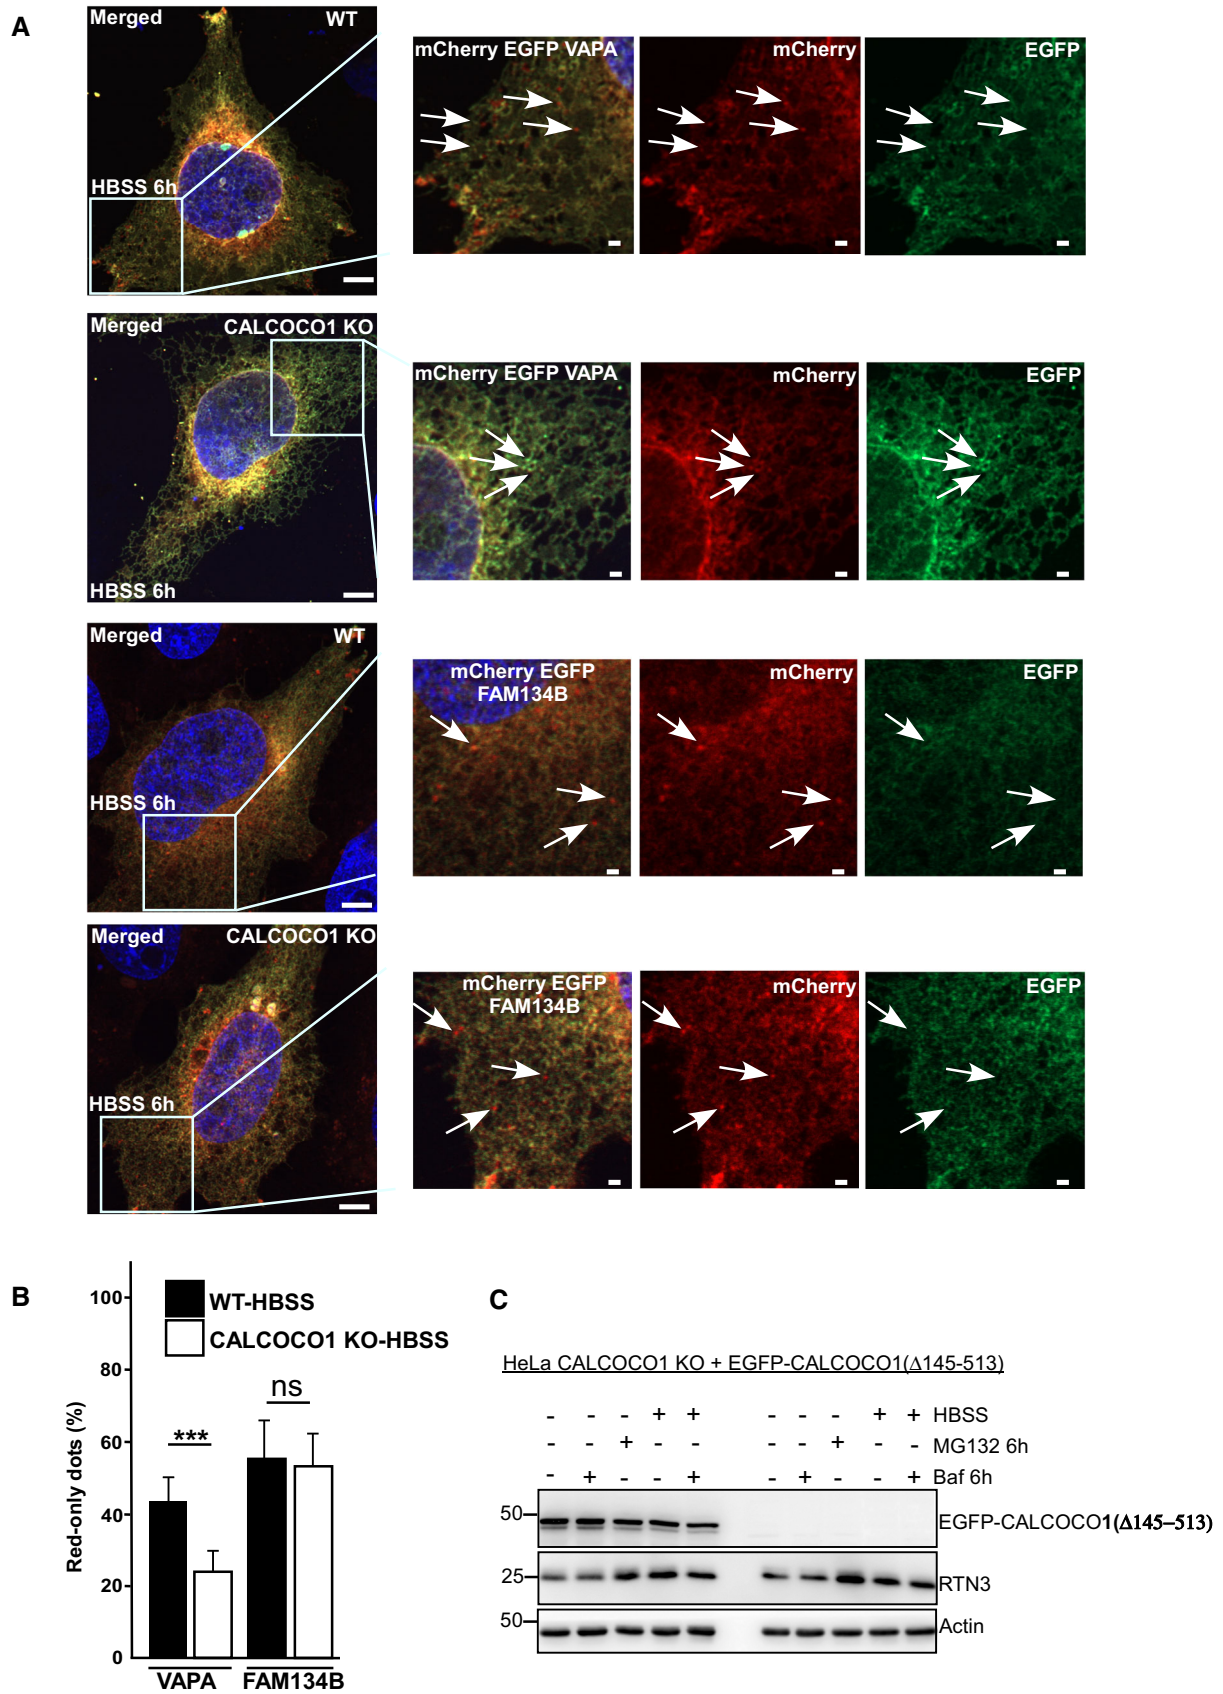

Figure EV5.
