# Supplementary material for: CALCOCO1 acts with VAMP‐associated proteins to mediate ER‐phagy
Source: PubMed Central journal article supplement (PMC7396842; doi:10.15252/embj.2019103649), 2020-06-11

FIGURE 7C

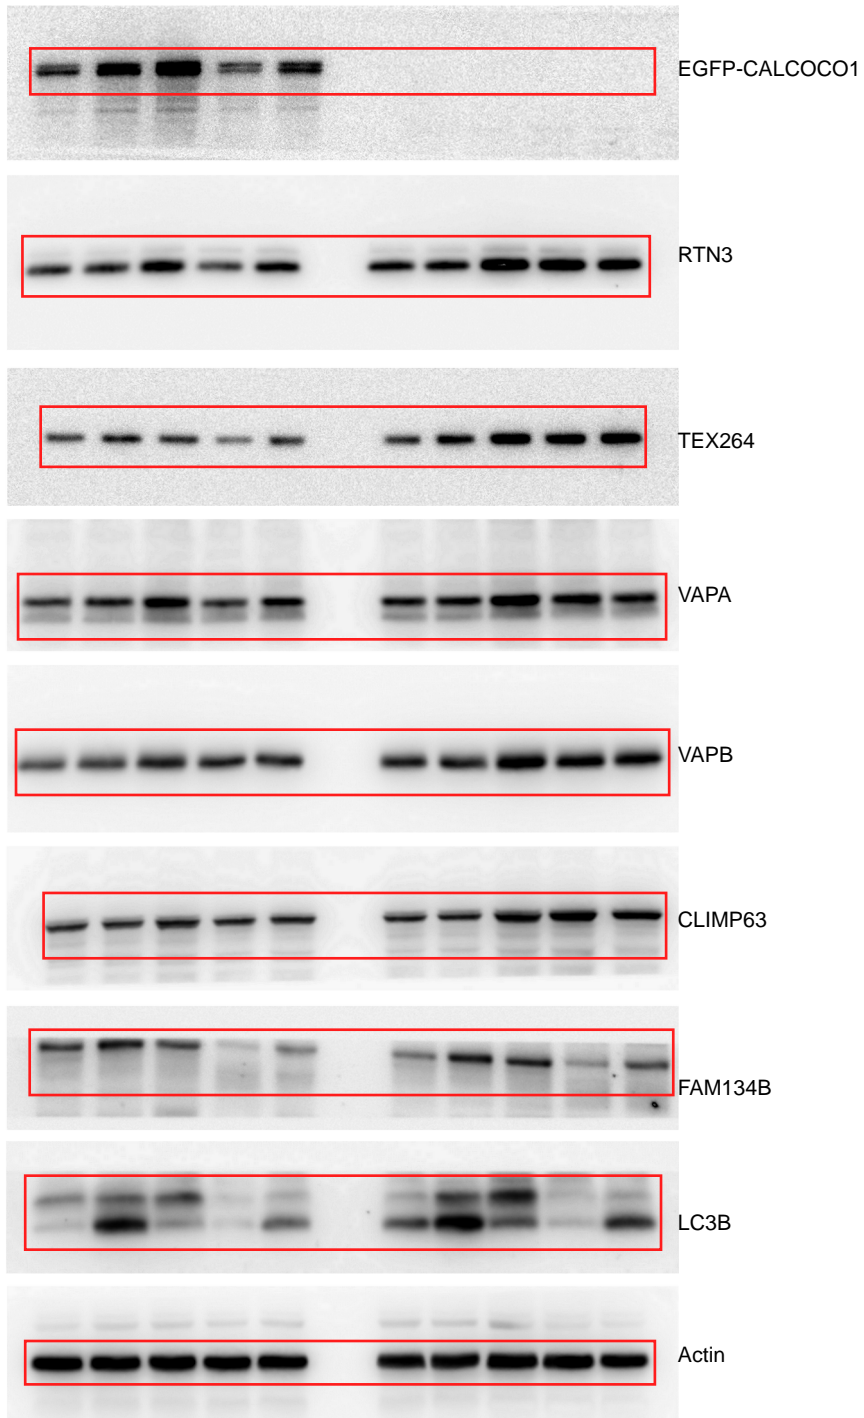

Supplement: EMBJ-39-e103649-s005.pdf [file EMBJ-39-e103649-s005.pdf]
